# Supplementary material
Source: HighWire-hosted journal article supplement (https://www.jneurosci.org/highwire/filestream/600261/field_highwire_adjunct_files/0/Figure_S1.pdf)

**A.**

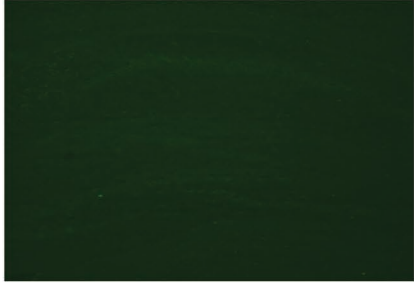

apoE -/-

**B.**

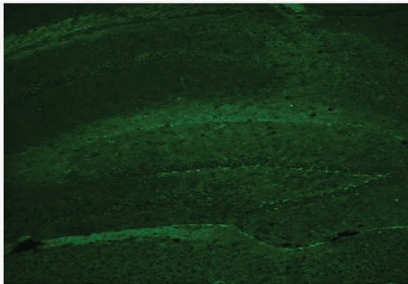

TRE2

**C.**

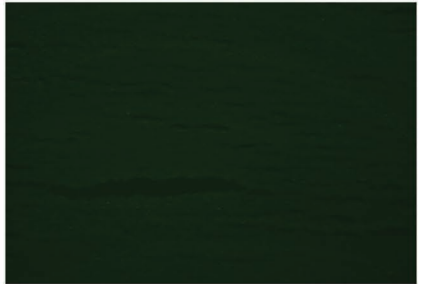

2° only

Supplement: Figure_S1.pdf [file Figure_S1.pdf]
